# Supplementary material for: Impact of Eutectic Solvents Utilization in the Microwave Assisted Extraction of Proanthocyanidins from Grape Pomace
Source: MDPI journal article supplement (doi:10.3390/molecules27010246), 2021-12-31
Supplement: s1 [file s1]

# Impact of Eutectic Solvents Utilization in the Microwave Assisted Extraction of Proanthocyanidins from grape pomace

Rodrigo T. Neto <sup>1</sup>, Sónia A. O. Santos <sup>1</sup>, Joana Oliveira <sup>2</sup> and Armando A. J. Silvestre <sup>1,\*</sup>

<sup>1</sup> CICECO - Aveiro Institute of Materials, Chemistry Department University of Aveiro, Campus de Santiago, 3810-193 Aveiro, Portugal

<sup>2</sup> REQUIMTE - Laboratório Associado para a Química Verde, Department of Chemistry and Biochemistry, Faculty of Sciences, University of Porto, Rua do Campo Alegre, 687, 4169-007 Porto, Portugal

\* Correspondence: armsil@ua.pt; Tel.: + 351 234 370 711; Fax: + 351 234 370 084

Figure S1 – Representative chromatogram of phloroglucinolysis products for proanthocyanidin mean degree of polymerization determination. 1 – phloroglucinol adduct of catechin/epicatechin; 2 – phloroglucinol adduct of catechin/epicatechin; 3 – catechin; 4 – phloroglucinol adduct of catechin gallate/epicatechin gallate; 5 – epicatechin; 6 – catechin gallate/epicatechin gallate

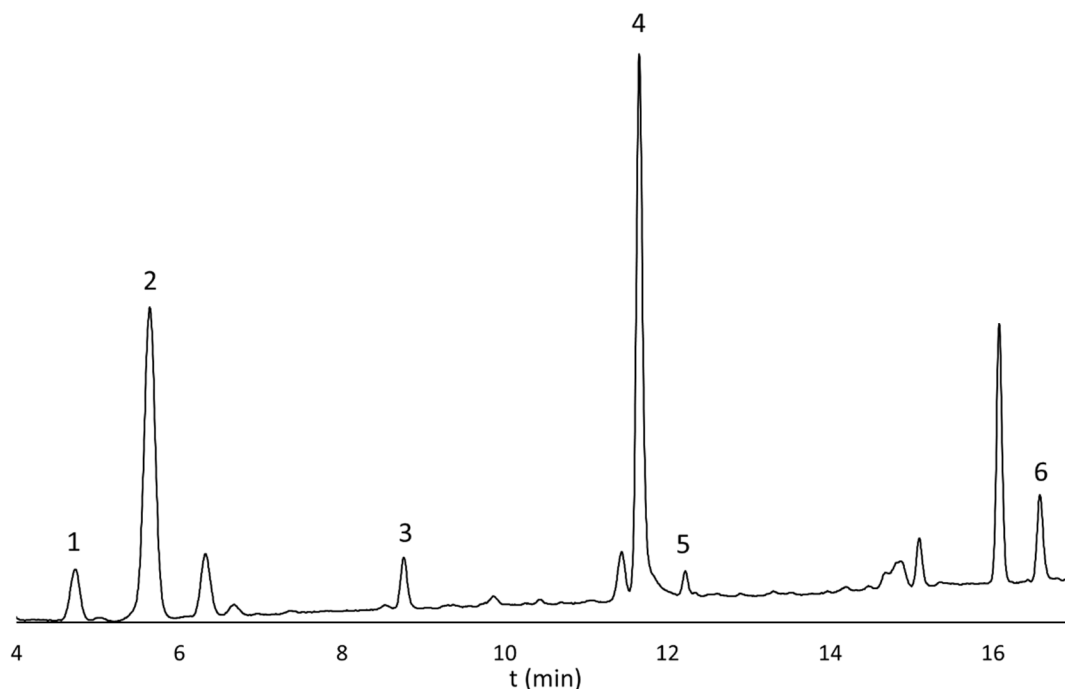

Table S1 – Compounds identified from phloroglucinolysis products and the respective retention times and molecular ions masses.

| No | Compound                                                      | $t_R$ (min) | $[M-H]^-$ (m/z) |
|----|---------------------------------------------------------------|-------------|-----------------|
| 1  | phloroglucinol adduct of catechin/epicatechin                 | 4.72        | 413.19          |
| 2  | phloroglucinol adduct of catechin/epicatechin                 | 5.64        | 413.19          |
| 3  | Catechin                                                      | 8.76        | 289.08          |
| 4  | phloroglucinol adduct of catechin gallate/epicatechin gallate | 11.65       | 565.20          |
| 5  | epicatechin                                                   | 12.22       | 289.08          |
| 6  | catechin gallate/epicatechin gallate                          | 16.58       | 441.09          |

Table S2 – Solvent composition and experimental results of solvent composition optimization of ChCl-LacA-water.

| Run |            |            |            | $Y_{PAC}$ (mg <sub>PAC</sub> /g <sub>GP</sub> ) |           | mDP      |           | %Gal     |           | $Y_{CH}$ (mg <sub>CH</sub> /g <sub>GP</sub> ) |           |
|-----|------------|------------|------------|-------------------------------------------------|-----------|----------|-----------|----------|-----------|-----------------------------------------------|-----------|
|     | $x_{ChCl}$ | $x_{LacA}$ | $x_{H_2O}$ | Measured                                        | Predicted | Measured | Predicted | Measured | Predicted | Measured                                      | Predicted |
| 1   | 0.490      | 0.408      | 0.102      | 101.7                                           | 113.7     | 9.94     | 10.60     | 38.11    | 38.32     | 60.9                                          | 66.2      |
| 2   | 0.248      | 0.602      | 0.150      | 113.0                                           | 115.1     | 9.52     | 10.23     | 38.03    | 38.19     | 68.8                                          | 63.6      |
| 3   | 0.492      | 0.201      | 0.307      | 114.7                                           | 116.4     | 10.79    | 10.39     | 34.86    | 35.54     | 82.0                                          | 79.1      |
| 4   | 0.700      | 0.240      | 0.060      | 72.8                                            | 77.2      | 9.18     | 8.70      | 33.58    | 35.73     | 52.0                                          | 55.8      |
| 5   | 0.698      | 0.000      | 0.302      | 70.8                                            | 71.0      | 7.57     | 7.75      | 31.00    | 31.52     | 62.5                                          | 60.0      |
| 6   | 0.505      | 0.000      | 0.495      | 73.2                                            | 80.5      | 7.47     | 7.85      | 31.37    | 31.49     | 65.3                                          | 73.3      |
| 7   | 0.502      | 0.000      | 0.498      | 74.5                                            | 80.3      | 7.40     | 7.83      | 31.24    | 31.47     | 66.8                                          | 73.5      |
| 8   | 0.700      | 0.237      | 0.063      | 89.4                                            | 77.5      | 8.82     | 8.70      | 38.04    | 35.69     | 56.8                                          | 56.0      |

|    |       |       |       |       |       |       |       |       |       |       |       |
|----|-------|-------|-------|-------|-------|-------|-------|-------|-------|-------|-------|
| 9  | 0.000 | 0.405 | 0.595 | 58.3  | 63.4  | 6.03  | 6.25  | 30.72 | 31.27 | 95.0  | 89.5  |
| 10 | 0.000 | 0.399 | 0.601 | 60.6  | 62.1  | 5.85  | 6.17  | 31.47 | 31.17 | 87.8  | 89.7  |
| 11 | 0.000 | 0.800 | 0.200 | 75.2  | 71.5  | 7.45  | 7.02  | 34.28 | 34.59 | 54.3  | 45.01 |
| 12 | 0.000 | 0.599 | 0.401 | 78.4  | 86.3  | 7.24  | 7.79  | 33.34 | 33.58 | 63.3  | 76.2  |
| 13 | 0.306 | 0.381 | 0.313 | 132.2 | 127.7 | 11.03 | 10.87 | 37.41 | 36.83 | 83.1  | 83.9  |
| 14 | 0.700 | 0.000 | 0.300 | 73.7  | 70.7  | 7.74  | 7.74  | 32.27 | 31.51 | 67.2  | 59.8  |
| 15 | 0.000 | 0.800 | 0.200 | 75.1  | 71.4  | 7.39  | 7.02  | 35.10 | 34.59 | 39.9  | 45.01 |
| 16 | 0.247 | 0.216 | 0.537 | 119.2 | 97.6  | 10.15 | 8.66  | 34.04 | 33.37 | 101.0 | 90.2  |

Table S3 – Solvent composition and experimental results of solvent composition optimization of ChCl-Glyc-water.

| Run | X <sub>ChCl</sub> | X <sub>Glyc</sub> | X <sub>H2O</sub> | Y <sub>PAC</sub> (mg <sub>PAC</sub> /g <sub>GP</sub> ) |           | mDP      |           | %Gal     |           | Y <sub>CH</sub> (mg <sub>CH</sub> /g <sub>GP</sub> ) |           |
|-----|-------------------|-------------------|------------------|--------------------------------------------------------|-----------|----------|-----------|----------|-----------|------------------------------------------------------|-----------|
|     |                   |                   |                  | Measured                                               | Predicted | Measured | Predicted | Measured | Predicted | Measured                                             | Predicted |
| 1   | 0.000             | 1.000             | 0.000            | 63.3                                                   | 62        | 7.62     | 7.65      | 39.80    | 39.48     | 69.9                                                 | 63.2      |
| 2   | 0.321             | 0.479             | 0.200            | 74.2                                                   | 71.1      | 7.45     | 7.37      | 34.90    | 34.28     | 70.8                                                 | 66.0      |
| 3   | 0.000             | 0.758             | 0.242            | 70.0                                                   | 72.6      | 7.60     | 7.67      | 35.58    | 36.18     | 81.1                                                 | 79.1      |
| 4   | 0.501             | 0.000             | 0.499            | 71.7                                                   | 76.0      | 7.13     | 7.14      | 31.21    | 31.97     | 71.2                                                 | 66.2      |
| 5   | 0.699             | 0.000             | 0.301            | 66.2                                                   | 70.7      | 7.85     | 7.96      | 31.00    | 32.21     | 69.1                                                 | 69.5      |
| 6   | 0.242             | 0.259             | 0.499            | 68.2                                                   | 70.8      | 6.63     | 6.66      | 32.49    | 31.93     | 61.5                                                 | 67.3      |
| 7   | 0.488             | 0.229             | 0.283            | 74.5                                                   | 73.3      | 7.47     | 7.50      | 33.26    | 32.92     | 65.8                                                 | 67.3      |
| 8   | 0.659             | 0.281             | 0.060            | 47.87                                                  | 46.94     | 7.06     | 7.18      | 32.33    | 32.10     | 54.5                                                 | 51.1      |
| 9   | 0.502             | 0.498             | 0.000            | 47.11                                                  | 45.78     | 6.73     | 6.79      | 31.85    | 33.55     | 44.03                                                | 44.57     |
| 10  | 0.000             | 0.502             | 0.498            | 60.7                                                   | 62.5      | 6.57     | 6.59      | 31.89    | 32.24     | 70.6                                                 | 74.1      |
| 11  | 0.000             | 1.000             | 0.000            | 63.3                                                   | 62.0      | 7.71     | 7.65      | 40.00    | 39.48     | 58.1                                                 | 63.2      |
| 12  | 0.000             | 0.502             | 0.498            | 66.1                                                   | 62.5      | 6.65     | 6.59      | 32.28    | 32.24     | 77.2                                                 | 74.1      |
| 13  | 0.657             | 0.283             | 0.060            | 48.02                                                  | 47.04     | 7.33     | 7.17      | 33.88    | 32.11     | 53.6                                                 | 51.1      |
| 14  | 0.500             | 0.000             | 0.500            | 81.4                                                   | 76.0      | 7.15     | 7.14      | 32.83    | 31.97     | 69.1                                                 | 66.1      |
| 15  | 0.246             | 0.754             | 0.000            | 51.5                                                   | 55.8      | 7.04     | 7.03      | 35.77    | 36.40     | 44.86                                                | 51.2      |
| 16  | 0.699             | 0.000             | 0.301            | 73.6                                                   | 70.7      | 7.80     | 7.96      | 32.18    | 32.21     | 62.0                                                 | 69.5      |

Table S4 – Extraction conditions and experimental results of extraction conditions optimization of ChCl-LacA-water.

| Run | temp (°C) | %BM   | t (min) | Y <sub>PAC</sub> (mg <sub>PAC</sub> /g <sub>GP</sub> ) |           | mDP      |           | %Gal     |           | Y <sub>CH</sub> (mg <sub>CH</sub> /g <sub>GP</sub> ) |           |
|-----|-----------|-------|---------|--------------------------------------------------------|-----------|----------|-----------|----------|-----------|------------------------------------------------------|-----------|
|     |           |       |         | Measured                                               | Predicted | Measured | Predicted | Measured | Predicted | Measured                                             | Predicted |
| 1   | 130       | 9,84  | 10      | 112.8                                                  | 109.8     | 3.293    | 3.415     | 63.8     | 61.0      | 144.1                                                | 145.3     |
| 2   | 100       | 17,51 | 10      | 127.8                                                  | 135.1     | 7.08     | 6.74      | 50.7     | 53.2      | 103.3                                                | 94.4      |
| 3   | 100       | 2,621 | 10      | 121.7                                                  | 122.8     | 2.959    | 3.524     | 44.89    | 42.88     | 135.3                                                | 149.4     |
| 4   | 100       | 9,99  | 6       | 135.8                                                  | 137.5     | 8.22     | 8.72      | 44.27    | 43.93     | 113.0                                                | 110.8     |
| 5   | 100       | 2,471 | 2       | 201.4                                                  | 202.1     | 3.949    | 4.280     | 41.24    | 38.90     | 142.6                                                | 156.2     |
| 6   | 100       | 10,22 | 6       | 139.3                                                  | 136.8     | 9.09     | 8.77      | 43.43    | 44.09     | 111.4                                                | 109.8     |
| 7   | 70        | 10,63 | 2       | 77.4                                                   | 87.3      | 6.83     | 7.97      | 34.91    | 37.50     | 76.3                                                 | 76.4      |
| 8   | 130       | 17,72 | 6       | 53.9                                                   | 61.7      | 2.996    | 4.543     | 58.1     | 57.0      | 84.9                                                 | 92.9      |
| 9   | 130       | 10,30 | 2       | 141.3                                                  | 123.1     | 5.24     | 4.386     | 58.6     | 56.6      | 137.4                                                | 138.0     |
| 10  | 100       | 10,30 | 6       | 150.2                                                  | 136.5     | 8.89     | 8.79      | 44.06    | 44.14     | 105.6                                                | 109.5     |
| 11  | 100       | 17,47 | 2       | 84.3                                                   | 90.5      | 8.24     | 7.63      | 47.10    | 49.41     | 90.4                                                 | 81.3      |

|    |     |       |    |       |       |       |       |       |       |       |       |
|----|-----|-------|----|-------|-------|-------|-------|-------|-------|-------|-------|
| 12 | 70  | 10,01 | 10 | 79.8  | 72.3  | 7.32  | 6.98  | 37.09 | 39.43 | 82.3  | 81.1  |
| 13 | 70  | 17,46 | 6  | 90.3  | 85.8  | 8.85  | 8.15  | 41.68 | 36.77 | 72.0  | 81.6  |
| 14 | 70  | 2,569 | 6  | 73.8  | 76.0  | 4.983 | 4.878 | 26.84 | 26.40 | 109.2 | 95.9  |
| 15 | 130 | 2,626 | 6  | 158.0 | 171.5 | 2.193 | 1.398 | 41.73 | 46.68 | 223.3 | 208.6 |

---
